# Supplementary material for: The Bombyx mori singed Gene Is Involved in the High-Temperature Resistance of Silkworms
Source: MDPI journal article supplement (doi:10.3390/insects15040264), 2024-04-12
Supplement: s1 [file s1]

**Table S1. Primers used in this study.**

| Primer                  | Sequence                                                                 |
|-------------------------|--------------------------------------------------------------------------|
| <i>Bmsn</i> -Flag-BamHI | F: 5' cgggatccATGGATTACAAGGATGACGACGATAAGAACGGACACAGCAATGGCGACA 3'       |
| <i>Bmsn</i> -Flag-XbaI  | R: 5' gctctagaCTACTTATCGTCGTCATCCTTGTAATCGTACTCCCAGTGCGTGGCGGAG 3'       |
| pBacL                   | F: 5' ATCAGTGACACTTACCGCATTGACA 3'<br>R: 5' TGACGAGCTTGTTGGTGAGGATTCT 3' |
| pBacR                   | F: 5' TACGCATGATTATCTTTAACGTA 3'<br>R: 5' GTACTGTCATCTGATGTACCAGG 3'     |
| Q-BmLeft Gene           | F: 5' ACAAATCATTTTCGCAAGGTGTC 3'<br>R: 5' TTCGATTTGATCACTGGTGGTG 3'      |
| Q-BmRight Gene          | F: 5' ACACCAAGTTTCAAGTCAATCG 3'<br>R: 5' AATCCCTGACTATCCTGTAACG 3'       |
| Q- <i>Bmsn</i>          | F: 5' TCCACACCTGCAACAACAAG 3'<br>R: 5' GAAGAGTTCGTCCCTGGTGA 3'           |
| Q-SW22934               | F: 5' TTCGTACTGGCTCTTCTCGT 3'<br>R: 5' CAAAGTTGATAGCAATCCCT 3'           |
| Q- <i>Bmsn</i>          | F: 5' TCCACACCTGCAACAACAAG 3'<br>R: 5' GAAGAGTTCGTCCCTGGTGA 3'           |
| Q-BmSOD1                | F: 5' CTTGATCAGCAGGATGAAAAG 3'<br>R: 5' CAATGATGCTGTTAGGTCCATG 3'        |
| Q-BmSOD2                | F: 5' CAAATAGCTACATGCCAGAACC 3'<br>R: 5' CACGAACGTTCTTGTACTGAAG 3'       |
| Q-BmSOD3                | F: 5' AACATTATTGTCGTACGCTTG 3'<br>R: 5' CATTACCAGTCGTCAGGGATAG 3'        |
| Q-BmCAT                 | F: 5' TTGCAACCTCGATACAATGTC 3'<br>R: 5' TTGGCAATAGCTCGTTGTTTAG 3'        |
| Q-BmGADD45              | F: 5' GATTGTGAGACTAAGCTGAGGA 3'<br>R: 5' CTGTCTCTCGGCTTCAGATAAT 3'       |
| Q-BmGpx                 | F: 5' AGAGATAGTTTGCTTTGCCTCT 3'<br>R: 5' GCTTCAAATACTTCCACAGTGG 3'       |
